# Supplementary material for: Gallic Acid‐L‐Leucine Conjugate Protects Mice against LPS‐Induced Inflammation and Sepsis via Correcting Proinflammatory Lipid Mediator Profiles and Oxidative Stress
Source: Hindawi journal article supplement (doi:10.1155/2018/1081287), 2018-01-01
Supplement: f1 [file 1081287.f1.pdf]

**Supplementary File**

**Gallic acid-L-leucine conjugate protects mice against LPS-induced inflammation and sepsis via correcting pro-inflammatory lipid mediator profiles and Oxidative stress**

**Yuanyuan Cheng<sup>1</sup>, Xuechen Li<sup>2</sup>, Hung-Fat Tse<sup>3</sup>, Jianhui Rong<sup>1,\*</sup>**

<sup>1</sup>School of Chinese Medicine, The University of Hong Kong, Hong Kong, China

<sup>2</sup>Department of Chemistry, The University of Hong Kong, Hong Kong, China

<sup>3</sup>Department of Medicine, The University of Hong Kong, Hong Kong, China

\*Corresponding author: [jrong@hkucc.hku.hk](mailto:jrong@hkucc.hku.hk)

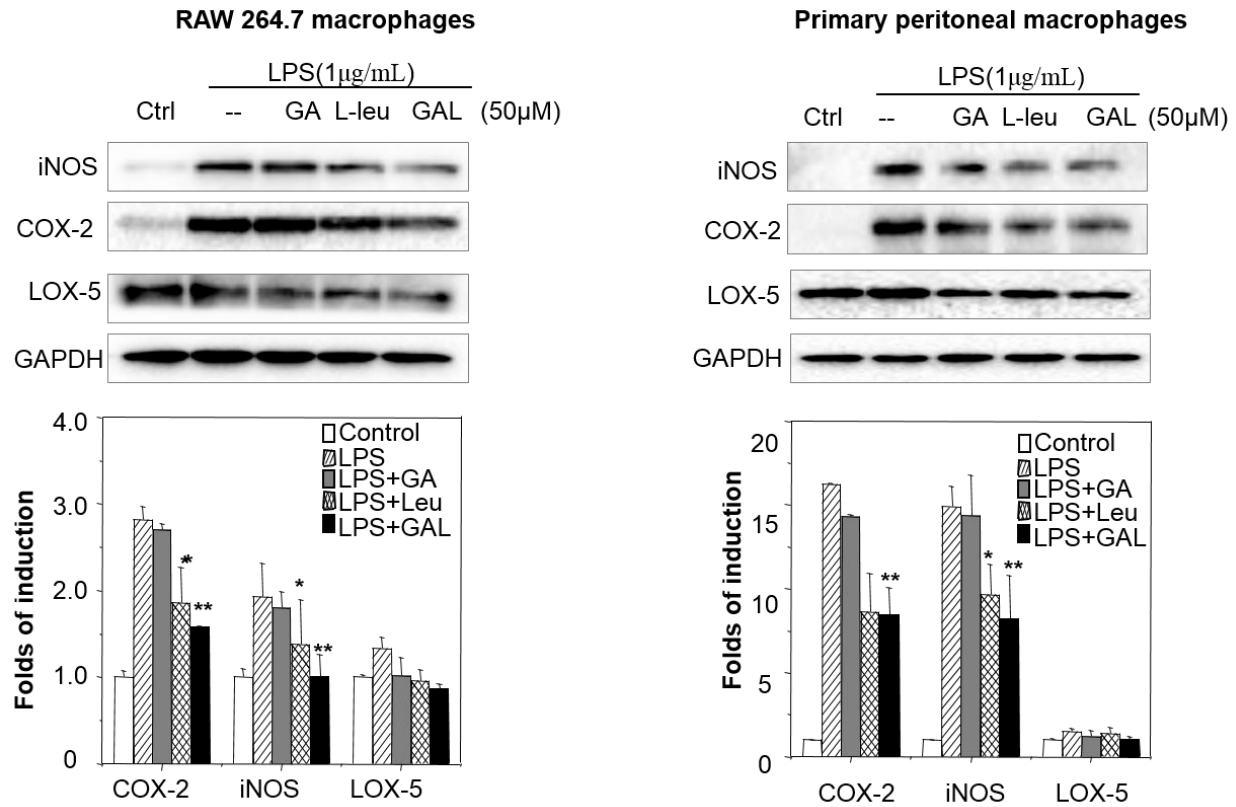

**Supplementary Figure 1.** (A) Effects of Gallic acid (GA), methyl-l-leucine (L-Leu) and GAL on LPS-induced COX-2, 5-LOX and iNOS in RAW264.7 cells. Following 24 h treatment with GAL and LPS, the expression of COX-2, 5-LOX and iNOS was analyzed by Western blotting, and quantified by a densitometric method. The results were expressed as a percentage of the untreated control (n=3). \*, p<0.05; \*\*, p<0.01 (Sample vs LPS alone). (B) Effects of Gallic acid (GA), methyl-l-leucine (L-Leu) and GAL on LPS-induced COX-2, 5-LOX and iNOS in primary macrophages. The expression of COX-2, 5-LOX and iNOS was analyzed in the same fashion as described in Panel B. The results were expressed as a percentage of the untreated control (n=3). \*\*, p<0.01; \*\*\*, p<0.001 (Sample vs LPS alone).

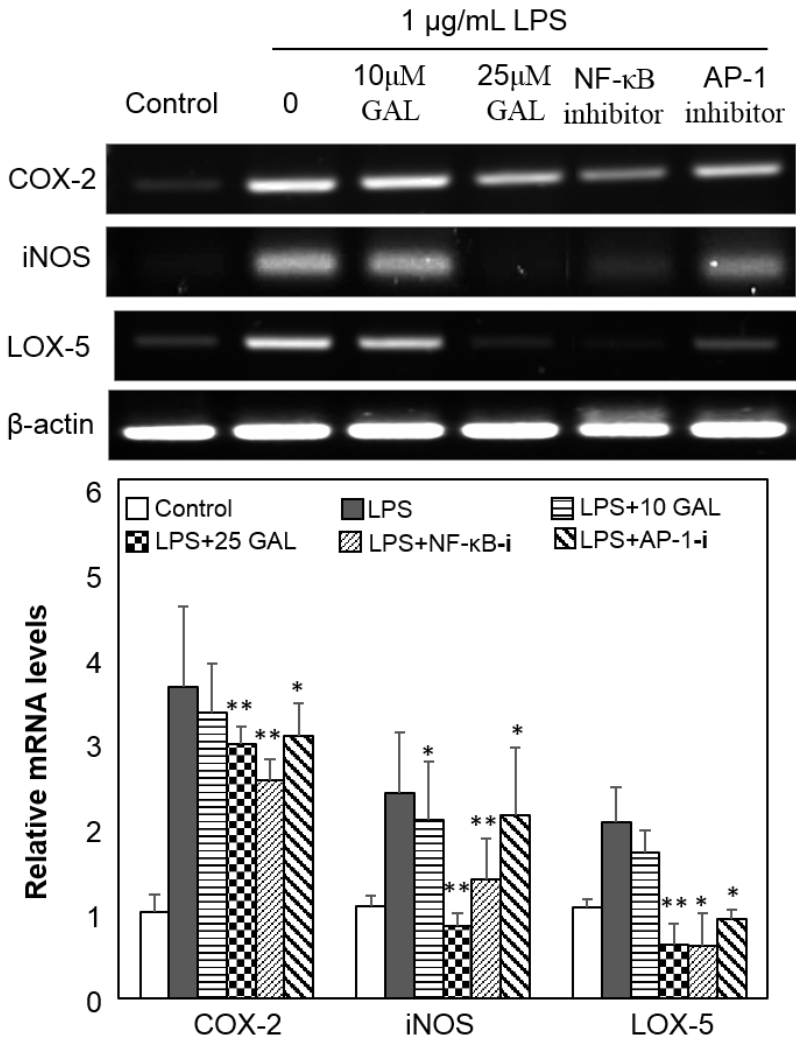

**Supplementary Figure 2. Parallel analysis of GAL, NF- $\kappa$ B inhibitor and AP-1 inhibitor for the suppression of COX-2, iNOS and 5-LOX mRNA expression.** (A) RT-PCR detection of COX-2, 5-LOX and iNOS mRNA expression. Following 24 h treatment with GAL (10 and 25  $\mu$ M), NF- $\kappa$ B inhibitor (10  $\mu$ g/mL), AP-1 inhibitor (1  $\mu$ M) and LPS stimulation, the total RNAs were isolated from RAW264.7 cells, and analyzed for COX-2, 5-LOX and iNOS mRNA expression by RT-PCR. The gels were quantified by a densitometric method. The results were expressed as a percentage of the untreated control (n=3). \*, p<0.05; \*\*, p<0.01 (GAL+LPS vs LPS).

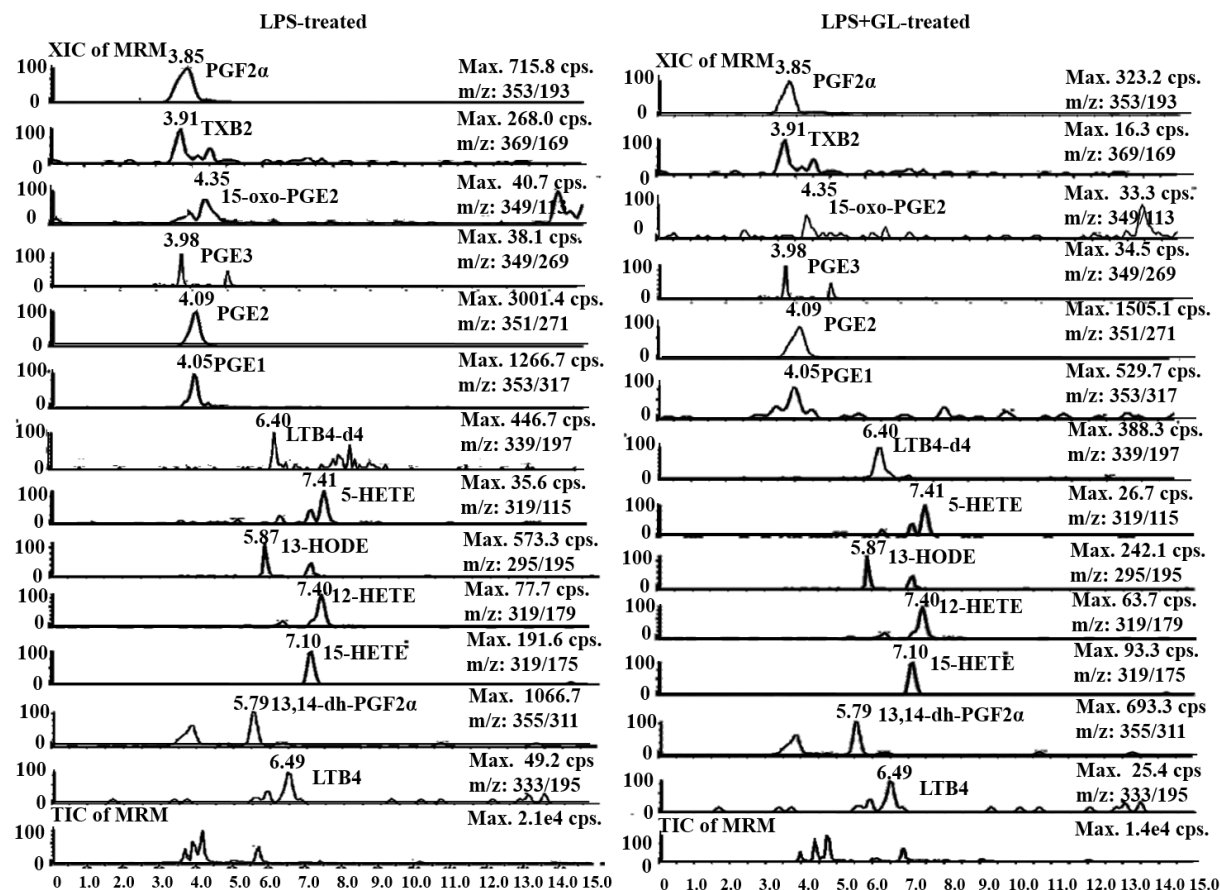

**Supplementary Figure 3. The MS profiles for lipids mediator detection.**

**Table 1. The parameters of LC/MS/MS under MRM for lipids mediators.**

| Lipid mediator | MRM        | CE(eV) | RT (time) |
|----------------|------------|--------|-----------|
| PGE2           | 351 -- 271 | 17     | 4.09      |
| PGE1           | 351-- 271  | 17     | 4.05      |
| PGF2 $\alpha$  | 353 -- 193 | 25     | 3.85      |
| PGE3           | 349 -- 269 | 15     | 3.98      |
| 15-oxo-PGE2    | 349 -- 113 | 20     | 4.35      |

|                        |            |    |      |
|------------------------|------------|----|------|
| 13,14-dh-PGE2 $\alpha$ | 355 -- 311 | 25 | 5.79 |
| TXB2                   | 369 -- 169 | 25 | 3.91 |
| 5-HETE                 | 319 -- 115 | 20 | 7.41 |
| 12-HETE                | 319 -- 179 | 17 | 7.40 |
| 15-HETE                | 319 -- 175 | 18 | 7.10 |
| 13-HODE                | 295 -- 195 | 25 | 5.87 |
| LTB4                   | 335 -- 195 | 17 | 6.48 |
| LTB4-d4                | 339 -- 197 | 17 | 6.47 |
